# Supplementary material for: Expanding the clinical and genetic spectrum of Heimler syndrome
Source: PubMed Central journal article supplement (PMC6909578; doi:10.1186/s13023-019-1243-x), 2019-12-12
Supplement: 13023_2019_1243_MOESM4_ESM.pdf [file 13023_2019_1243_MOESM4_ESM.pdf]

Supplementary Table 2 Follow-up of intraretinal layer thickness in patient 2.

| Thickness ( $\mu\text{m}$ ) | First visit | 2 months | 2 years |
|-----------------------------|-------------|----------|---------|
| TR                          | 510/599     | 603/666  | 541/586 |
| RNFL                        | 14/14       | 14/13    | 13/13   |
| GCC                         | 9/8         | 8/8      | 7/8     |
| IPL                         | 15/12       | 15/10    | 15/10   |
| INL                         | 15/10       | 14/8     | 14/8    |
| OPL                         | 30/18       | 30/12    | 29/13   |
| ONL                         | 299/426     | 412/513  | 324/415 |
| RPE                         | 13/11       | 13/11    | 10/11   |

Abbreviations. TR: total retinal, RNFL: retinal nerve fiber layer, GCL: ganglion cell layer, IPL: inner plexiform layer, INL: inner nuclear layer, OPL: outer plexiform layer, ONL: outer nuclear layer, RPE: retinal pigment epithelium.
