# Supplementary material for: Expanding the clinical and genetic spectrum of Heimler syndrome
Source: PubMed Central journal article supplement (PMC6909578; doi:10.1186/s13023-019-1243-x), 2019-12-12
Supplement: 13023_2019_1243_MOESM5_ESM.pdf [file 13023_2019_1243_MOESM5_ESM.pdf]

Supplementary table 3. Reported pathogenic variants in the PEX1, PEX6 and PEX26 genes in HGMD associated with Zellweger syndrome.

| Gene | Nucleotide             | Amino acid change |
|------|------------------------|-------------------|
| PEX6 | c.277C>G               | Arg93Gly          |
| PEX6 | c.280G>C               | Ala94Pro          |
| PEX6 | c.557C>A               | Ala186Glu         |
| PEX6 | c.611C>G               | Ser204Term        |
| PEX6 | c.656A>C               | Gln219Pro         |
| PEX6 | c.659G>T               | Gly220Val         |
| PEX6 | c.1198T>A              | Tyr400Asn         |
| PEX6 | c.1532T>G              | Leu511Arg         |
| PEX6 | c.1553C>A              | Ala518Asp         |
| PEX6 | c.1711G>A              | Ala571Thr         |
| PEX6 | c.1801C>T              | Arg601Trp         |
| PEX6 | c.1814T>G              | Leu605Arg         |
| PEX6 | c.1958C>G              | Ser653Term        |
| PEX6 | c.1992G>C              | Glu664Asp         |
| PEX6 | c.2225T>C              | Leu742Pro         |
| PEX6 | c.2356C>T              | Arg786Trp         |
| PEX6 | c.2362G>A              | Val788Met         |
| PEX6 | c.2440C>T              | Arg814Term        |
| PEX6 | c.2482C>T              | Gln828Term        |
| PEX6 | c.2591T>C              | Phe864Ser         |
| PEX6 | c.2626C>T              | Arg876Trp         |
| PEX6 | c.2663G>C              | Arg888Pro         |
| PEX6 | c.2726T>A              | Leu909Gln         |
| PEX6 | c.2735C>T              | Ala912Val         |
| PEX6 | c.1047-2A>G            |                   |
| PEX6 | c.1047-1G>A            |                   |
| PEX6 | c.1054C>T              |                   |
| PEX6 | c.1131-1G>C            |                   |
| PEX6 | c.1689-1G>T            |                   |
| PEX6 | c.2095-2A>G            |                   |
| PEX6 | c.2301-15C>G           |                   |
| PEX6 | c.2301-5C>G            |                   |
| PEX6 | c.2300+28G>A           |                   |
| PEX6 | c.2667-2A>G            |                   |
| PEX6 | c.2807-2A>G            |                   |
| PEX6 | c.115_120delGCCCTG     |                   |
| PEX6 | c.311delG              |                   |
| PEX6 | c.656delA              |                   |
| PEX6 | c.689_690delAG         |                   |
| PEX6 | c.856delC              |                   |
| PEX6 | c.867delA              |                   |
| PEX6 | c.1314_1321delGGAGGCCT |                   |
| PEX6 | c.1367+1delG           |                   |
| PEX6 | c.1404delA             |                   |
| PEX6 | c.1495delC             |                   |
| PEX6 | c.1793_1794delAG       |                   |
| PEX6 | c.1947delG             |                   |
| PEX6 | c.2207_2217del11       |                   |
| PEX6 | c.224dupT              |                   |
| PEX6 | c.1313dupT             |                   |
| PEX6 | c.883_1130del248       |                   |
| PEX6 | ex. 14-16              |                   |
| PEX6 | c.2602_2603ins350      |                   |

|      |                                                            |                                      |
|------|------------------------------------------------------------|--------------------------------------|
| PEX6 | c.10_69del;c.126_216del, p.A4_L23del;p.A43fsX31            |                                      |
| PEX6 | c.727C>T                                                   | Gln243Term                           |
| PEX6 | c.1646C>T                                                  | Ala549Val                            |
| PEX6 | c.1802G>A                                                  | Arg601Gln                            |
| PEX6 | c.2435G>A                                                  | Arg812Gln                            |
| PEX6 | c.2434C>T                                                  | Arg812Trp                            |
| PEX6 | c.2546A>C                                                  | Asn849Thr                            |
| PEX6 | c.2579G>A                                                  | Arg860Gln                            |
| PEX6 | c.2578C>T                                                  | Arg860Trp                            |
| PEX6 | c.883-2A>G                                                 | IVS1 as A-G -2                       |
| PEX6 | c.1130+1G>A                                                | IVS3 ds G-A +1                       |
| PEX6 | c.1688+1G>A                                                | IVS7 ds G-A +1                       |
| PEX6 | c.2666+2T>C                                                | IVS15 ds T-C +2                      |
| PEX6 | c.275_280delTGCGGG                                         |                                      |
| PEX6 | c.402delC                                                  |                                      |
| PEX6 | c.530delC                                                  |                                      |
| PEX6 | c.914delA                                                  |                                      |
| PEX6 | c.1301delC                                                 |                                      |
| PEX6 | c.510dupT                                                  | TCCAGAG^170TCTtGGGGACAGCA            |
| PEX6 | c.689_690dupAG                                             | GGCCAGA^230GAGagTCATCGAACA           |
| PEX6 | c.814_817dupCTTG                                           | CTGGCG^272CTTGcttgTCCCTGCCAC         |
| PEX6 | c.1415dupC                                                 | TACGG^470GGCCCCcCCCAGGCTGT           |
| PEX6 | c.1891delG                                                 | CTAG_IE_GGC^630TTTgTGGTAGGGGA        |
| PEX1 | c.911_912delCT                                             | TCAGCA^303ACCTctGTTTTTCATA           |
| PEX1 | c.782_783delAA                                             | GAGAAG^260AAACaaGAGACATCTT           |
| PEX1 | c.781C>T                                                   | Gln261Term                           |
| PEX1 | c.760dupT                                                  | AGCATT^253TTTTtCCTTTCAATC            |
| PEX1 | c.643_647delACCAA                                          | AGAACTT^214CAAaccaaGCAACTTCAG        |
| PEX1 | c.627G>A                                                   | Met209Ile                            |
| PEX1 | c.616C>T                                                   | Gln206Term                           |
| PEX1 | c.5G>A                                                     | Trp2Term                             |
| PEX1 | c.569C>A                                                   | Ser190Term                           |
| PEX1 | c.56_57delTG                                               | GCAGTG^18ACTGtgGCCTTCACCA            |
| PEX1 | c.547C>T                                                   | Arg183Term                           |
| PEX1 | c.475G>C                                                   | Ala159Pro                            |
| PEX1 | c.473-1G>A                                                 | IVS4 as G-A -1                       |
| PEX1 | c.3G>A                                                     | Met1Ile                              |
| PEX1 | c.3732_3736dupCATT                                         | CCATCC^1245ATTAcattaGTGAAGATGA       |
| PEX1 | c.3710C>A                                                  | Ala1237Glu                           |
| PEX1 | c.3693_3696delGTCA                                         | GGCTATT^1230AGTcagtCACATTTAAT        |
| PEX1 | c.3438+2T>C                                                | IVS21 ds T-C +2                      |
| PEX1 | c.343_344insCT                                             | TCAGCA^114GATGctATTGGGAGAT           |
| PEX1 | c.3379dupC                                                 | AATATG^1126TACCcGGCTCTACTT           |
| PEX1 | c.3378C>G                                                  | Tyr1126Term                          |
| PEX1 | c.3287C>G                                                  | Ser1096Term                          |
| PEX1 | c.3180dupT                                                 | GGCCTTA^1060CATtGGAATGCTGC           |
| PEX1 | c.3038G>A                                                  | Arg1013His                           |
| PEX1 | c.3030G>T                                                  | Gln1010His                           |
| PEX1 | c.3022_3024delCCT                                          | CTGTCCT^1007CCTcctGATCAG_E19119_GTGA |
| PEX1 | c.2T>C                                                     | Met1Thr                              |
| PEX1 | c.2927-15_3208-342delinsATAGTATAGA,c.3849+779_3849+2910del |                                      |
| PEX1 | c.2926+2dupT                                               | CTTA^975CAGG_E18118_GTtAATAATTATA    |
| PEX1 | c.2916delA                                                 | ATGGA^971GTAGAAaGGCTTACAGG           |
| PEX1 | c.2846G>A                                                  | Arg949Gln                            |

|      |                                  |                                   |
|------|----------------------------------|-----------------------------------|
| PEX1 | c.2845C>T                        | Arg949Trp                         |
| PEX1 | c.2843G>A                        | Arg948Gln                         |
| PEX1 | c.2814_2818delCTTTG              | GCATT^937CTTTTctttgATGAATTTGA     |
| PEX1 | c.2760delA                       | CAAGT^919GAACAaGCTGTTCGGG         |
| PEX1 | c.274G>C                         | Val92Leu                          |
| PEX1 | c.2730delA                       | GGCCA^909GAGTTaCTCAGCAAAT         |
| PEX1 | c.273+1G>A                       | IVS2 ds G-A +1                    |
| PEX1 | c.270delA                        | CAAAT^89GGGGGaCAG_E2I2_GTAAGCA    |
| PEX1 | c.2654C>G                        | Thr885Arg                         |
| PEX1 | c.2636T>C                        | Leu879Ser                         |
| PEX1 | c.2636_2638delTGT                | ACAGGA^877ATACtgtTGTATGGTCC       |
| PEX1 | c.2614C>T                        | Arg872Term                        |
| PEX1 | c.2537_2545delATGAAGTTAinsTC     | GGTGGG^845TTACatgaagttaGGCAGATACT |
| PEX1 | c.2489delA                       | CGAAGT^829GTCAaCCTGCATAAA         |
| PEX1 | c.2479C>T                        | Arg827Term                        |
| PEX1 | c.2416+1G>T                      | IVS14 ds G-T +1                   |
| PEX1 | c.2391_2392delTC                 | CTCGA^796CTCTcGTCAGAGTAT          |
| PEX1 | c.2387T>C                        | Leu796Pro                         |
| PEX1 | c.2383C>T                        | Arg795Term                        |
| PEX1 | c.2364G>A                        | IVS14 ds G-A -53                  |
| PEX1 | c.2224C>T                        | Gln742Term                        |
| PEX1 | c.2097dupT                       | TAAAA^698GAGTTtTATCTCCATG         |
| PEX1 | c.2085_2089delGATAA              | TGAAT^694GATATgataaAAGAGTTTAT     |
| PEX1 | c.2085_2087delGAT                | TTTGAAT^694GATatgATAAAAGAGT       |
| PEX1 | c.2034_2035delCA                 | AACAT^677GAGCAaGTCCTGATGC         |
| PEX1 | c.1991T>C                        | Leu664Pro                         |
| PEX1 | c.1976T>A                        | Val659Asp                         |
| PEX1 | c.1957T>A                        | Trp653Arg                         |
| PEX1 | c.1900+2T>C                      | IVS11 ds T-C +2                   |
| PEX1 | c.1891delG                       | TGACTGT^630AAAgCTTTACGAG_E11I11_G |
| PEX1 | c.1886_1887delGT                 | AGAGTT^628GACTgtAAAGCTTTAC        |
| PEX1 | c.1865_1866insGAGTGTGGA          | AACTG^621GATGCgagtgtggaCCATGTGGAG |
| PEX1 | c.1842delA                       | CAATC^613TGTAaGAAGCATTTG          |
| PEX1 | c.1769T>G                        | Leu590Arg                         |
| PEX1 | c.1727dupG                       | GCCTC^575CTGGGgACGCCCTTTG         |
| PEX1 | c.1716_1717delCA                 | GCACATC^571ACTcaCAGCCTCCTG        |
| PEX1 | c.1713_1716delTCAC               | AGCAC^570ATCACtcacAGCCTCCTGG      |
| PEX1 | c.1706A>C                        | His569Pro                         |
| PEX1 | c.1663T>C                        | Ser555Pro                         |
| PEX1 | c.1508_1509dupTA                 | TCTGAGT^503ATaGTTcATTCTT          |
| PEX1 | c.1501_1502delCT                 | GGAAATTT^500TCTctGAGTATAGTT       |
| PEX1 | c.1483+1G>A                      | IVS7 ds G-A +1                    |
| PEX1 | c.1435_1439dupCCTTT              | TGCTT^479CCTTtctttGGTAATATCA      |
| PEX1 | c.1414C>T                        | Gln472Term                        |
| PEX1 | c.1411C>T                        | Gln471Term                        |
| PEX1 | c.1370dupT                       | CTAAA^456GACATtAAGTGAAGAA         |
| PEX1 | c.1340T>C                        | Leu447Ser                         |
| PEX1 | c.130-2A>T                       | IVS1 as A-T -2                    |
| PEX1 | c.1239+1G>T                      | IVS5 ds G-T +1                    |
| PEX1 | c.1193delT                       | AACAAT^397GCCAtCAAATATACC         |
| PEX1 | c.1108dupA                       | AGATCAA^368AAAaAAAATTAGGT         |
| PEX1 | 190 bp within ex. 12-13          |                                   |
| PEX1 | 190 bp nt. 2227-2416             |                                   |
| PEX1 | 171 bp nt. 1900-2070, cd.634-690 |                                   |

|       |                     |                                |
|-------|---------------------|--------------------------------|
| PEX26 | c.185G>A            | Trp62Term                      |
| PEX26 | c.256T>C            | Cys86Arg                       |
| PEX26 | c.265G>A            | Gly89Arg                       |
| PEX26 | c.315G>A            | Trp105Term                     |
| PEX26 | c.230+1G>A          | IVS1 ds G-A +1                 |
| PEX26 | c.73_79delGTGCGCG   | CAGCGAG^24CCGgtgcgcgCGGTCCCggc |
| PEX26 | c.34dupC            | TCTGCA^10GCCCCCCTCAGGGG        |
| PEX26 | c.668_814del        | gDNA                           |
| PEX26 | c.426_548dup122insT |                                |
